# LDL-cholesterol lowering with evolocumab, and outcomes according to age and sex in patients in the FOURIER Trial

Peter Sever<sup>1\*</sup>, Ioanna Gouni-Berthold<sup>2</sup>, Anthony Keech<sup>3</sup>, Robert Giugliano<sup>4</sup>, Terje R. Pedersen<sup>5</sup>, KyungAh Im<sup>4</sup>, Huei Wang<sup>6</sup>, Beat Knusel<sup>6</sup>, Marc S. Sabatine<sup>4</sup>, and Michelle L. O'Donoghue<sup>4</sup>

<sup>1</sup>National Heart and Lung Institute, Imperial College London, UK; <sup>2</sup>Polyclinic for Endocrinology, Diabetes and Preventive Medicine, University of Cologne, Germany; <sup>3</sup>NHMRC Clinical Trials Centre, University of Sydney, Australia; <sup>4</sup>TIMI Study Group, Brigham and Women's Hospital and Harvard Medical School, USA; <sup>5</sup>Centre for Preventive Medicine, Ullevål University Hospital, Norway; and <sup>6</sup>Clinical Development, Amgen Inc., USA

Received 17 December 2019; accepted 7 January 2020; online publish-ahead-of-print 5 February 2020

## Aims

Some trials have reported diminished efficacy for statins in the elderly, and in women compared with men. We examined the efficacy and safety of evolocumab by patient age and sex in the FOURIER trial, the first major cardiovascular outcome trial of a PCSK9 inhibitor.

## Methods and results

FOURIER was a randomised, double blind trial, comparing evolocumab with placebo in 27,564 patients with atherosclerotic cardiovascular disease receiving statin therapy (median follow-up 2.2 years). The primary endpoint was cardiovascular death, myocardial infarction, stroke, hospitalisation for unstable angina or coronary revascularisation. Cox proportional hazards models were used to assess the efficacy of evolocumab versus placebo stratified by quartiles of patient age and by sex. There were small variations in the cardiovascular event rate across the age range (for the primary endpoint, Kaplan–Meier at 3 years 15.6%, >69 years, vs. 15.1%, ≤56 years,  $P=0.45$ ); however, the relative efficacy of evolocumab was consistent regardless of patient age (for the primary endpoint (Q1 hazard ratio, 95% confidence interval) 0.83, 0.72–0.96, Q2 0.88, 0.76–1.01, Q3 0.82, 0.71–0.95, Q4 0.86, 0.74–1.00;  $P_{\text{interaction}}=0.91$ ), and the key secondary endpoint (cardiovascular death, myocardial infarction, stroke) (Q1 0.74 (0.61–0.89), Q2 0.83 (0.69–1.00), Q3 0.78 (0.65–0.94), Q4 0.82 (0.69–0.98));  $P_{\text{interaction}}=0.81$ ). Women had a lower primary endpoint rate than men (Kaplan–Meier at 3 years 12.5 vs. 15.3%, respectively,  $P<0.001$ ). Relative risk reductions in the primary endpoint and key secondary endpoint were similar in women (0.81 (0.69–0.95) and 0.74 (0.61–0.90), respectively) compared with men (0.86 (0.80–0.94) and 0.81 (0.73–0.90), respectively),  $P_{\text{interaction}}=0.48$  and 0.44, respectively. Adverse events were more common in women and with increasing age but, with the exception of injection site reactions, there were no important significant differences reported by those assigned evolocumab versus placebo.

## Conclusions

The efficacy and safety of evolocumab are similar throughout a broad range of ages and in both men and women.

## Keywords

LDL-cholesterol • evolocumab • age • gender • cardiovascular outcomes

\* Corresponding author. Peter Sever, National Heart and Lung Institute, Imperial College London, ICTEM Building, 3rd Floor, Du Cane Road, London, W12 0NN, UK. Email: [p.sever@imperial.ac.uk](mailto:p.sever@imperial.ac.uk)

Published on behalf of the European Society of Cardiology. All rights reserved. © The Author(s) 2020. For permissions, please email: [journals.permissions@oup.com](mailto:journals.permissions@oup.com).

## Introduction

The Further Cardiovascular Outcomes Research with PCSK9 Inhibition in Subjects with Elevated Risk (FOURIER) was a large cardiovascular outcomes trial of the PCSK9 inhibitor evolocumab, which recruited patients with a history of atherosclerotic disease, including prior myocardial infarction (MI), ischaemic stroke and symptomatic peripheral artery disease.<sup>1</sup> Evolocumab reduced low-density lipoprotein (LDL) cholesterol by a median of 59% resulting in a significant benefit on major cardiovascular endpoints over a median follow-up of 2.2 years.<sup>2</sup>

Although the elderly are at high risk of complications from cardiovascular disease, they have traditionally been underrepresented in clinical trials of statin therapy. Although the data are mixed, a more recent analysis of statin trials has suggested that there may be attenuation of the cardiovascular benefits in the elderly population (>75 years) compared with those in younger age groups.<sup>3,4</sup> In addition, some trials of statins have shown less compelling benefits in women compared with men;<sup>5,6</sup> however, an updated pooled analysis of trials focusing on outcomes in women suggests that the clinical benefits of statin treatment are comparable between men and women.<sup>7</sup>

In view of the conflicting data regarding the clinical benefit of LDL-cholesterol lowering in women and the elderly, we examined the efficacy and safety of evolocumab in the large FOURIER trial that had robust effects on LDL-cholesterol lowering and robust representation from these patient subgroups.

## Methods

### Patients

The study design, organisation and main results of the study have previously been published.<sup>1,2</sup> The patients eligible for FOURIER were men and women aged between 40 and 85 years, with stable atherosclerotic cardiovascular disease (MI, non-haemorrhagic stroke, or symptomatic peripheral artery disease) and additional risk factors placing them at increased cardiovascular risk. Patients were potentially eligible for inclusion if they had a LDL-cholesterol of 70 mg/dL or greater (1.8 mmol/L) or non-high-density lipoprotein (HDL) cholesterol of 100 mg/dL or greater (2.6 mmol/L), while taking an optimised lipid-lowering regimen including a high or moderate intensity statin, with or without ezetimibe. Patients were randomly assigned, in a 1:1 ratio, to evolocumab or placebo and were followed for a median of 2.2 years. The primary efficacy endpoint was major cardiovascular events, defined as the composite of cardiovascular death, MI, stroke, hospitalisation for unstable angina, or coronary revascularisation. The key secondary endpoint (SEP) was the composite of cardiovascular death, MI or stroke. Other SEPs included the components of the primary endpoint (PEP). Key exclusions were recent MI or stroke within 4 weeks, prior haemorrhagic stroke, estimated glomerular filtration rate of less than 20 mL/min/1.73 m<sup>2</sup>, New York Heart Association class 3 or 4 heart failure or left ventricular ejection fraction less than 30%, malignancy in the prior 10 years, and elevation of creatinine kinase five-fold or greater or hepatic aminotransferases greater than three-fold above normal.<sup>2</sup> Cardiovascular events were adjudicated by an independent blinded committee.

Patients in FOURIER were recruited from 49 countries. The study conformed to Good Clinical Practice guidelines and was undertaken following the guidelines of the Declaration of Helsinki. The protocol and all

subsequent amendments were reviewed and ratified by ethical review boards.

### Statistical methods

Age groups were stratified by quartiles ( $\leq 56$ , 56–63, 63–69 and  $>69$  years). Baseline characteristics were compared by subgroup of interest, using the Wilcoxon rank sum for continuous variables and chi squared test for categorical variable. Efficacy analyses were conducted in the intention-to-treat population based on time from randomisation to the first occurrence of any element of the composite endpoint. Safety evaluations included all the patients who underwent random assignment and received at least one dose of study drug. Chi squared tests were used for treatment comparisons of subject incidences of adverse events by subgroups of interest. Hazard ratios (HRs) and 95% confidence intervals (CIs) were generated with the use of a stratified Cox proportional hazards model using randomisation strata for cardiovascular endpoints; *P* values for time to event analyses were calculated with the use of log rank tests. For the current analysis, analyses were restricted to subgroups of interest including age by quartile and patient sex. A sensitivity analysis was also conducted using prespecified age cut-offs (<65, 65–74, >75 years). Tests for subgroup heterogeneity were conducted by including a treatment by subgroup interaction term in the Cox proportional hazards model. Given the exploratory nature of the analysis, a *P* value less than 0.05 was considered significant. Absolute risk reduction of cardiovascular endpoints between treatment groups at month 36, by subgroups of interest, were calculated based on Kaplan–Meier estimates at month 36 between treatment groups.

## Results

### Baseline demographics and characteristics

The baseline demographics by age and sex are shown in [Tables 1 and 2](#), respectively.

Older patients and female patients were more likely to have a background history of non-haemorrhagic stroke and peripheral artery disease and less likely to have a history of MI. They were more likely to be hypertensive and less likely to be current smokers.

### Lipid responses

#### Baseline values

Baseline LDL-cholesterol tended to be slightly higher in younger than older patients (Q1 median LDL-cholesterol 94 mg/dL, Q2 93 mg/dL, Q3 91 mg/dL, Q4 90 mg/dL; [Table 1, Figure 1](#)). HDL-cholesterol levels were higher in older patients (Q1, 41 mg/dL vs. Q4, 48 mg/dL) and triglyceride levels were lower (Q1, 145 mg/dL vs. Q4, 121 mg/dL). Lipoprotein (a) levels were similar regardless of age.

There were small differences in median LDL-cholesterol at baseline between men (91 mg/dL) and women (95 mg/dL); ([Table 2, Figure 2](#)). Median HDL-cholesterol levels were lower in men (42 mg/dL) compared with women (49 mg/dL). Triglyceride levels were similar in the two sexes. In women lipoprotein (a) levels were higher than in men (median 51.0 vs. 34.0 nmol/L,  $P < 0.0001$ ) but there was marked variation in levels in both sexes ([Table 2](#)).

**Table 1** Characteristics of patients at baseline by age quartile.

| Characteristics                                                          | Q1<br>Age <56<br>(N=7122) | Q2<br>56 < age ≤ 63<br>(N=7154) | Q3<br>63 < age ≤ 69<br>(N=7055) | Q4<br>Age >69<br>(N=6233) | P value |
|--------------------------------------------------------------------------|---------------------------|---------------------------------|---------------------------------|---------------------------|---------|
| Age (years) mean (SD)                                                    | 50.8 (4.2)                | 60.0 (2.0)                      | 66.4 (1.6)                      | 74.2 (3.5)                |         |
| Male sex, no. (%)                                                        | 5729 (80.4)               | 5512 (77.0)                     | 5276 (74.8)                     | 4278 (68.6)               | <0.0001 |
| White race, no. (%)                                                      | 5827 (81.8)               | 6104 (85.3)                     | 6104 (86.5)                     | 5423 (87.0)               | <0.0001 |
| Weight, kg mean (SD)                                                     | 89.4 (18.7)               | 86.5 (17.4)                     | 84.4 (16.2)                     | 80.1 (15.6)               | <0.0001 |
| Type of atherosclerosis                                                  |                           |                                 |                                 |                           |         |
| Myocardial infarction, no. (%)                                           | 6095 (85.6)               | 5773 (80.7)                     | 5667 (80.3)                     | 4816 (77.3)               | <0.0001 |
| Median time from most recent previous myocardial infarction (IQR), years | 2.0 (0.5–4.6)             | 3.3 (0.9–7.1)                   | 4.2 (1.4–9.5)                   | 4.7 (1.7–10.8)            | <0.0001 |
| Nonhemorrhagic stroke                                                    | 1055 (14.8)               | 1401 (19.6)                     | 1392 (19.7)                     | 1489 (23.9)               | <0.0001 |
| Median time from most recent previous stroke (IQR), years                | 2.4 (0.8–5.1)             | 3.4 (1.1–7.2)                   | 3.5 (1.2–8.1)                   | 3.7 (1.3–8.3)             | <0.0001 |
| Peripheral artery disease, no. (%)                                       | 672 (9.4)                 | 1074 (15.0)                     | 1005 (14.2)                     | 891 (14.3)                | <0.0001 |
| Cardiovascular risk factors                                              |                           |                                 |                                 |                           |         |
| Hypertension, no./total no. (%)                                          | 5250/7121 (73.7)          | 5869/7154 (82.0)                | 5727/7055 (81.2)                | 5238/6233 (84.0)          | <0.0001 |
| Diabetes mellitus, no. (%)                                               | 2456 (34.5)               | 2943 (41.1)                     | 2515 (35.6)                     | 2167 (34.8)               | <0.0001 |
| Current cigarette use, no./total no. (%)                                 | 3179/7121 (44.6)          | 2753/7154 (38.5)                | 1279/7055 (18.1)                | 566/6232 (9.1)            | <0.0001 |
| Statin use, no. (%)                                                      |                           |                                 |                                 |                           |         |
| High intensity                                                           | 5304 (74.5)               | 5196 (72.6)                     | 4711 (66.8)                     | 3892 (62.4)               | <0.0001 |
| Moderate intensity                                                       | 1806 (25.4)               | 1946 (27.2)                     | 2324 (32.9)                     | 2316 (37.2)               |         |
| Low intensity, unknown intensity, or no data                             | 12 (0.2)                  | 12 (0.2)                        | 20 (0.3)                        | 25 (0.4)                  |         |
| Ezetimibe, no. (%)                                                       | 442 (6.2)                 | 352 (4.9)                       | 371 (5.3)                       | 275 (4.4)                 | <0.0001 |
| Other cardiovascular medications, no./total no. (%)                      |                           |                                 |                                 |                           |         |
| Aspirin, P2Y <sub>12</sub> inhibitor, or both                            | 6780/7117 (95.3)          | 6697/7146 (93.7)                | 6464/7050 (91.7)                | 5491/6226 (88.2)          | <0.0001 |
| Beta-blocker                                                             | 5559/7117 (78.1)          | 5471/7146 (76.6)                | 5225/7050 (74.1)                | 4560/6226 (73.2)          | <0.0001 |
| ACE inhibitor or ARB, aldosterone antagonist, or both                    | 5400/7117 (75.9)          | 5634/7146 (78.8)                | 5556/7050 (78.8)                | 4943/6226 (79.4)          | <0.0001 |
| Median lipid measures (IQR)                                              |                           |                                 |                                 |                           |         |
| LDL-cholesterol, mg/dl                                                   | 94.0 (80.5–113.5)         | 92.5 (80.0–110.5)               | 90.5 (79.0–105.0)               | 90.0 (79.0–105.0)         | <0.0001 |
| Total cholesterol, mg/dl                                                 | 168.5 (151.0–192.5)       | 168.5 (151.0–190.0)             | 166.5 (151.0–185.5)             | 166.0 (151.0–185.5)       | <0.0001 |
| HDL-cholesterol, mg/dl                                                   | 40.5 (34.5–48.0)          | 43.0 (36.5–51.0)                | 45.5 (38.0–54.5)                | 47.5 (40.0–56.5)          | <0.0001 |
| Triglycerides, mg/dl                                                     | 145.0 (106.0–200.5)       | 138.5 (104.0–188.0)             | 129.0 (97.5–176.5)              | 121.0 (93.0–161.0)        | <0.0001 |
| Lipoprotein (a), nmol/litre                                              | 38.0 (13.0–163.0)         | 36.0 (12.0–165.0)               | 37.0 (13.0–167.0)               | 37.0 (13.0–161.0)         | 0.5739  |

P values test of association between age quartiles and baseline characteristics based on chi-square or rank sum test. To convert the values for cholesterol to millimoles per litre, multiply by 0.02586. To convert the values for triglycerides to millimoles per litre, multiply by 0.01129.

ACE: angiotensin-converting enzyme; ARB: angiotensin receptor blocker; HDL: high-density lipoprotein; IQR: interquartile range; LDL: low-density lipoprotein; SD: standard deviation.

\*Race was reported by the patients.

†Patients could have more than one type of atherosclerosis.

‡Statin intensity was categorised in accordance with the guidelines of the American College of Cardiology and American Heart Association.<sup>14</sup>

## Effect of treatment

Evolocumab significantly reduced LDL-cholesterol in all age groups, with clinically similar reductions at 4 weeks (54–59%; *Figure 1*), although there was statistical heterogeneity owing largely to the very large sample size ( $P_{\text{interaction}} < 0.001$ ). Likewise, evolocumab reduced LDL-cholesterol in both men and women at 4 weeks, with a nominally greater reduction in men (58% vs. 52%;  $P < 0.001$ ; *Figure 2*).

## Clinical efficacy of evolocumab

There were small variations in the cardiovascular event rate across the age range (for the PEP, Kaplan–Meier (KM) at 3 years 15.6%, >69 years, vs. 15.1%, ≤56 years,  $P = 0.45$ ). For PEP: cardiovascular death, MI, stroke, hospitalisation for unstable angina, coronary revascularisation), there were no significant differences in the clinical effects of evolocumab by quartile of age (Q1 HR 0.83, 95% CI 0.72–0.96, Q2

**Table 2** Characteristics of patients at baseline by sex.

| Characteristics                                             | Male<br>(N = 20,795) | Female<br>(N = 6769) | P value |
|-------------------------------------------------------------|----------------------|----------------------|---------|
| Age, years mean (SD)                                        | 62.0 (9.0)           | 64.1 (8.8)           | <0.0001 |
| White race, no. (%)                                         | 17,783 (85.5)        | 5675 (83.8)          | 0.0008  |
| Weight, kg mean (SD)                                        | 88.1 (16.6)          | 76.7 (16.9)          | <0.0001 |
| Type of atherosclerosis                                     |                      |                      |         |
| Myocardial infarction, no. (%)                              | 17,544 (84.4)        | 4807 (71.0)          | <0.0001 |
| Median time from most recent previous myocardial infarction | 3.4 (1.0–7.8)        | 3.0 (0.9–6.6)        | <0.0001 |
| Non-haemorrhagic stroke                                     | 3505 (16.9)          | 1832 (27.1)          | <0.0001 |
| Median time from most recent previous stroke (IQR)          | 3.2 (1.1–7.1)        | 3.4 (1.1–7.3)        | 0.1477  |
| Peripheral artery disease, no. (%)                          | 2616 (12.6)          | 1026 (15.2)          | <0.0001 |
| Cardiovascular risk factors                                 |                      |                      |         |
| Hypertension, no./total no. (%)                             | 16,314/20,794 (78.5) | 5770/6769 (85.2)     | <0.0001 |
| Diabetes mellitus, no. (%)                                  | 7345 (35.3)          | 2736 (40.4)          | <0.0001 |
| Current cigarette use, no./total no. (%)                    | 6097/20,793 (29.3)   | 1680/6769 (24.8)     | <0.0001 |
| Statin use, no. (%)                                         |                      |                      |         |
| High intensity                                              | 14,404 (69.3)        | 4699 (69.4)          | 0.9431  |
| Low intensity, unknown intensity, or no data                | 53 (0.3)             | 16 (0.2)             |         |
| Moderate intensity                                          | 6338 (30.5)          | 2054 (30.3)          |         |
| Ezetimibe, no. (%)                                          | 1077 (5.2)           | 363 (5.4)            | 0.5555  |
| Other cardiovascular medications, no./total no. (%)         |                      |                      |         |
| Aspirin, P2Y <sub>12</sub> inhibitor, or both               | 19,325/20,777 (93.0) | 6107/6762 (90.3)     | <0.0001 |
| Beta-blocker                                                | 15,948/20,777 (76.8) | 4867/6762 (72.0)     | <0.0001 |
| ACE inhibitor or ARB, aldosterone antagonist, or both       | 16,330/20,777 (78.6) | 5203/6762 (76.9)     | 0.0043  |
| Median lipid measures (IQR)                                 |                      |                      |         |
| LDL-cholesterol, mg/dl                                      | 91.0 (79.0–107.0)    | 95.0 (81.5–113.5)    | <0.0001 |
| Total cholesterol, mg/dl                                    | 164.5 (148.5–184.5)  | 176.0 (159.5–198.0)  | <0.0001 |
| HDL-cholesterol, mg/dl                                      | 42.0 (36.0–50.0)     | 49.0 (41.5–59.0)     | <0.0001 |
| Triglycerides, mg/dl                                        | 133.0 (99.0–182.5)   | 133.5 (102.0–179.5)  | 0.1626  |
| Lipoprotein (a), nmol/litre                                 | 34.0 (12.0–154.0)    | 51.0 (16.0–192.0)    | <0.0001 |

P values test of association between sex and baseline characteristics based on chi-square or rank sum test. To convert the values for cholesterol to millimoles per litre, multiply by 0.02586. To convert the values for triglycerides to millimoles per litre, multiply by 0.01129.

ACE: angiotensin-converting enzyme; ARB: angiotensin receptor blocker; HDL: high-density lipoprotein; IQR: interquartile range; LDL: low-density lipoprotein; SD: standard deviation.

HR 0.88, 95% CI 0.76–1.01, Q3 HR 0.82, 95% CI 0.71–0.95, Q4 HR 0.86, 95% CI 0.74–0.99);  $P_{\text{interaction}} = 0.91$ ; [Table 3, Supplementary Figure 1](#)), or for the key SEP (cardiovascular death, MI, stroke; Q1 HR 0.74, 95% CI 0.61–0.89, Q2 HR 0.83, 95% CI 0.69–1.00, Q3 HR 0.78, 95% CI 0.65–0.94, Q4 HR 0.82, 95% CI 0.69–0.98;  $P_{\text{interaction}} = 0.81$ ; [Table 3, Supplementary Figure 2](#)). The absolute risk reduction with evolocumab was largely consistent across quartiles of age (Q1, 3.0% vs. Q4, 2.0% and for the SEP, Q1, 2.6% vs. Q4, 2.5% ([Table 3](#))). Similar results were observed for the individual components ([Supplementary Table 1](#)).

A sensitivity analysis was conducted using prespecified age cut-offs (<65, 65–75, >75 years) and yielded consistent results; specifically,

the clinical efficacy of evolocumab was similar in those aged over 75 years (HR 0.78; 95% CI 0.60–1.02), 65–75 years (HR 0.86; 95% CI 0.76–0.97) and less than 65 years (HR 0.86; 95% CI 0.78–0.94);  $P_{\text{interaction}}$  for the three age groups = 0.84). Likewise, for the key SEP, absolute risk reductions at month 36 were similar (HR 0.78 (95% CI 0.58–1.04), HR 0.82 (95% CI 0.70–0.95) and HR 0.79 (95% CI 0.69–0.90) for the three age groups, respectively;  $P_{\text{interaction}}$  for the three age groups = 0.94).

Women had a lower PEP rate than men (KM at 3 years 12.5% vs. 15.3%, respectively,  $P < 0.001$ ). For women, compared with men, there were no differences in the relative risk reduction for the PEP (HR 0.81 (95% CI 0.69–0.95) vs. HR 0.86 (95% CI 0.80–0.94),

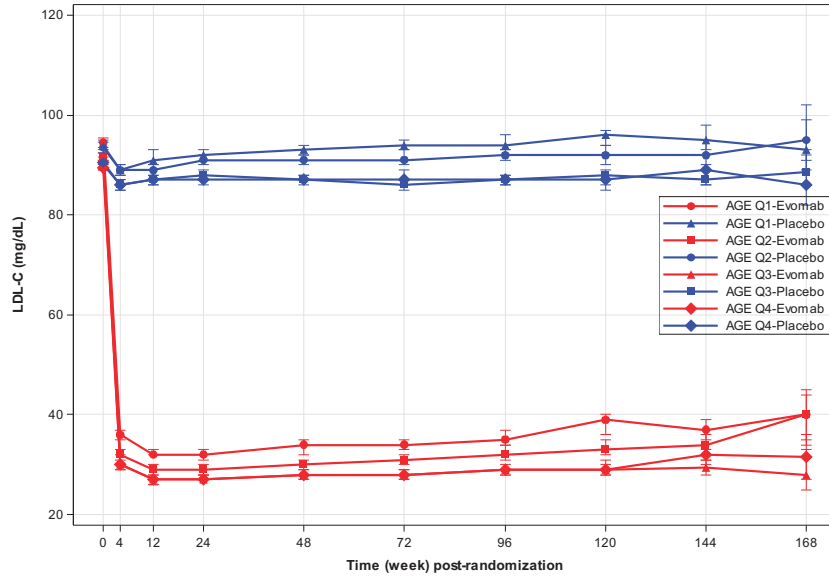

**Figure 1** LDL-cholesterol reduction with evolocumab and placebo stratified by age quartile. The median and 95% confidence interval LDL-cholesterol in mg/dL during the trial is shown for evolocumab and placebo, stratified by age quartiles (Q1–4) of less than 56 years, 56 to less than 63 years, 63 to less than 69 years, greater than 69 years, respectively (symbols and colour codes on figure). The treatment difference in LDL-cholesterol ranged from 57 and 60 mg/dL across the four age quartiles. To convert the values for LDL-cholesterol to millimoles per litre, multiply by 0.02586. Evomab: evolocumab; LDL-C: low-density lipoprotein cholesterol.

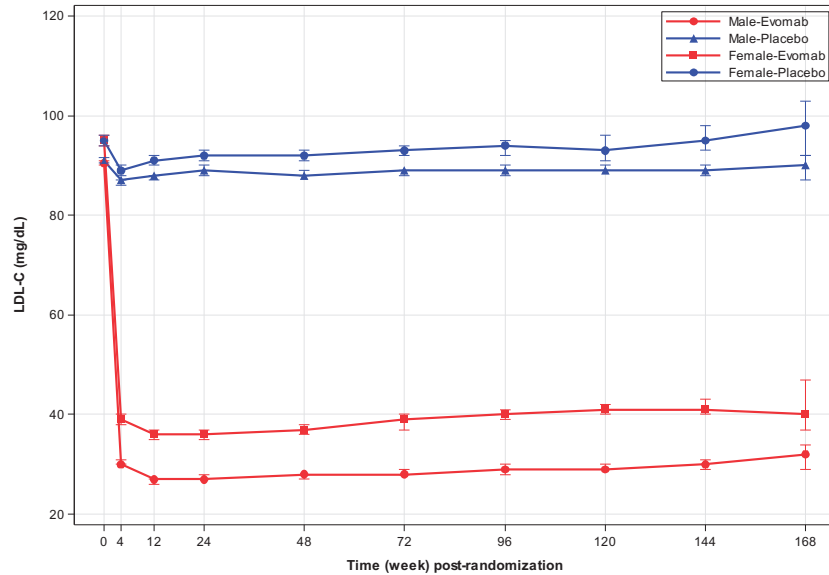

**Figure 2** LDL-cholesterol reduction with evolocumab and placebo stratified by sex. The median and 95% confidence interval LDL-cholesterol in mg/dL during the trial is shown for evolocumab and placebo, stratified by sex (symbols and colour codes on figure). The treatment difference in LDL-cholesterol was, on average, 59 to 60 mg/dL in men and from 50 to 52 mg/dL in women after randomisation. To convert the values for LDL-cholesterol to millimoles per litre, multiply by 0.02586. Evomab: evolocumab; LDL-C: low-density lipoprotein cholesterol.

**Table 3** Efficacy endpoint subgroup analysis by age quartile.

| Endpoints           | Subgroup   | Evolocumab |          |                 | placebo |          |                 | HR (95% CI)      | Log-rank P value | P <sub>interaction</sub> |
|---------------------|------------|------------|----------|-----------------|---------|----------|-----------------|------------------|------------------|--------------------------|
|                     |            | Total N    | Events N | 36-month KM (%) | Total N | Events N | 36-month KM (%) |                  |                  |                          |
| Primary: endpoint   | Age ≤56    | 3601       | 354      | 12.16           | 3521    | 407      | 15.14           | 0.83 (0.72–0.96) | 0.010            | 0.908                    |
|                     | Age >56–63 | 3493       | 344      | 12.84           | 3661    | 409      | 13.56           | 0.88 (0.76–1.01) | 0.077            |                          |
|                     | Age >63–69 | 3512       | 315      | 11.81           | 3543    | 381      | 14.32           | 0.82 (0.71–0.95) | 0.009            |                          |
|                     | Age >69    | 3178       | 331      | 13.58           | 3055    | 366      | 15.62           | 0.86 (0.74–0.99) | 0.049            |                          |
| Secondary: endpoint | Age ≤56    | 3601       | 188      | 6.69            | 3521    | 243      | 9.33            | 0.74 (0.61–0.89) | 0.002            | 0.813                    |
|                     | Age >56–63 | 3493       | 197      | 7.71            | 3661    | 249      | 8.84            | 0.83 (0.69–0.99) | 0.047            |                          |
|                     | Age >63–69 | 3512       | 191      | 7.57            | 3543    | 244      | 9.50            | 0.78 (0.65–0.94) | 0.010            |                          |
|                     | Age >69    | 3178       | 240      | 9.93            | 3055    | 277      | 12.42           | 0.82 (0.69–0.98) | 0.029            |                          |

Evolocumab significantly and consistently reduced the primary endpoint of cardiovascular death, myocardial infarction, stroke, unstable angina requiring rehospitalisation, and coronary revascularisation, and the key secondary endpoint of cardiovascular death, myocardial infarction and stroke across the age quartiles (Q1–4) of <56 years, 56–<63 years, 63–<69 years, ≥69 years, respectively. No statistical evidence of treatment effect modification by age was observed ( $P_{\text{interaction}}=0.91$  and  $0.81$  for the primary and secondary endpoint, respectively).

KM: Kaplan–Meier; CI: confidence interval; HR: hazard ratio.

**Table 4** Efficacy endpoint subgroup analysis by sex.

| Subgroup           | Evolocumab |          |                 | placebo  |           |                 | HR (95% CI)      | Log rank P value | P <sub>interaction</sub> |
|--------------------|------------|----------|-----------------|----------|-----------|-----------------|------------------|------------------|--------------------------|
|                    | Total N    | Events N | 36-month KM (%) | Total, N | Events, N | 36-month KM (%) |                  |                  |                          |
| Primary endpoint   |            |          |                 |          |           |                 |                  |                  |                          |
| Male               | 10,397     | 1068     | 13.50           | 10398    | 1229      | 15.32           | 0.86 (0.80–0.94) | <0.001           | 0.477                    |
| Female             | 3387       | 276      | 9.88            | 3382     | 334       | 12.54           | 0.81 (0.69–0.95) | 0.008            |                          |
| Secondary endpoint |            |          |                 |          |           |                 |                  |                  |                          |
| Male               | 10,397     | 643      | 8.39            | 10,398   | 785       | 10.17           | 0.81 (0.73–0.90) | <0.001           | 0.436                    |
| Female             | 3387       | 173      | 6.48            | 3382     | 228       | 9.17            | 0.74 (0.61–0.90) | 0.003            |                          |

Evolocumab significantly and consistently reduced the primary endpoint of cardiovascular death, myocardial infarction, stroke, unstable angina requiring rehospitalisation, and coronary revascularisation, and the key secondary endpoint of cardiovascular death, myocardial infarction and stroke and in men and women. No statistical evidence of treatment effect modification by sex was observed ( $P_{\text{interaction}}=0.48$  and  $0.44$  for the primary and key secondary endpoint, respectively).

KM: Kaplan–Meier; CI: confidence interval; HR: hazard ratio.

$P_{\text{interaction}}$  for sex = 0.48 (Table 4, Supplementary Figure 3), or SEP (HR 0.74 (95% CI 0.61–0.90), vs. HR 0.81 (95% CI 0.73–0.90)  $P=0.44$  (Table 4, Supplementary Figure 4)). For the individual components, there were no significant differences between men and women (Supplementary Table 2).

The absolute risk reduction of events at month 36, in women and men were similar for both the PEPs and SEPs (2.66% vs. 1.82%, Table 4).

## Adverse events

In aggregate, adverse events, serious adverse events and discontinuations of the study drug (evolocumab or placebo) were slightly more common in older than younger patients and in women versus men. There was a small and significant increase in injection site reactions associated with the use of evolocumab compared with placebo. This

difference was numerically greater in the youngest age quartile and in men versus women. Overall, there were no clinically important differences between evolocumab and placebo and no excess of new-onset diabetes in any subgroup of patients studied.

## Discussion

Despite the overwhelming evidence of cardiovascular benefits from trials of lipid lowering with statins, there is a reluctance to prescribe statins in elderly patients, often based on misconceptions about the balance of benefits and harms.<sup>8</sup> There is also evidence that in clinical practice women are often undertreated,<sup>9</sup> despite the fact that trial data confirm benefits in both sexes.<sup>7</sup> It was important, therefore, to establish whether treatment with a PCSK9 monoclonal antibody, which produced substantial reductions in LDL-cholesterol, would



confer consistent cardiovascular benefits across all age groups and in both sexes.

The results of the FOURIER trial demonstrated that, when added to statin therapy, the PCSK9 inhibitor evolocumab, lowered LDL-cholesterol by 59% compared with placebo, reduced the risk of the primary composite endpoint of cardiovascular death, MI, stroke, hospitalisation for unstable angina or coronary revascularisation by 15%, and reduced the main SEP of cardiovascular death, MI or stroke by 20%, during a median follow-up period of 2.2 years.<sup>2</sup>

In a recent Bayesian network meta-analysis, compared with statins, PCSK9 inhibitors were ranked as better treatment for the prevention of major adverse cardiovascular events, most likely explained by their greater effect on lowering LDL-cholesterol.<sup>10</sup>

The present analyses extend our observations on the main cardiovascular outcomes from FOURIER, and demonstrate beyond reasonable doubt, that the proportional reductions in these cardiovascular endpoints are consistent throughout the age range and are similar in men and women.

Overall in FOURIER there was no excess of either serious adverse events or adverse events (other than minor injection site reactions – approximately 2.1% vs. 1.6% with evolocumab and placebo, respectively) reported in association with evolocumab, and these findings are borne out in the current analyses. We found some minor differences in the rates of adverse events in men versus women, and across the age range, but there are no differences in those reported by those assigned evolocumab or placebo, with the exception of minor injection site reactions as previously described.

These results are very reassuring in comparison with the statin trials, in which in some studies it appears that the cardiovascular benefits of lipid lowering with statins may be attenuated in the elderly, and in women.<sup>3,5,6</sup> A recent report based on data from the Cholesterol Treatment Trialists Collaboration (CTTC) showed that the proportional reduction in the risk of major vascular events per mmol/l LDL-cholesterol reduction appears to be smaller among individuals older than 75 years (13% risk reduction) compared with those younger than 65 years (22% risk reduction) ( $P_{\text{trend}} = 0.06$ ).<sup>3</sup> The authors offered as a potential explanation the fact that these patients had a higher prevalence of severe heart failure and end-stage renal disease. Interestingly, in the same analysis of the CTTC data, women profited less than men (16% vs. 22% risk reduction, respectively,  $P_{\text{heterogeneity}} = 0.02$ ).

A recent analysis of the IMPROVE-IT trial also showed that the beneficial effects of adding ezetimibe to statins is present in both men and women,<sup>11</sup> with women having a 12% risk reduction compared with 5% in men, for the composite PEP ( $P_{\text{interaction}} = 0.26$ ). In the same trial the reduction in the PEP was significantly greater in subjects older than 75 years of age ( $P_{\text{interaction}} = 0.005$ ).<sup>12</sup>

The preliminary results of the ODYSSEY OUTCOMES trial with the PCSK9 inhibitor alirocumab showed that the relative risk reductions for the primary composite endpoint were broadly similar in women and men (9% vs. 17%, respectively,  $P_{\text{interaction}} = 0.35$ ) and also when stratified by age 65 or greater versus less than 65 years (21% vs. 11%, respectively,  $P_{\text{interaction}} = 0.19$ ).<sup>13</sup>

There are some limitations of the current analyses. The comparisons by age quartile and by sex are influenced by the different patient demographics as age increases, and in women compared with men.

Older patients and female patients were more likely to have a background history of non-haemorrhagic stroke and peripheral artery disease, and less likely to have a history of MI. They were more likely to be hypertensive and less likely to be current smokers. These differences will affect the absolute risk of event rates in the various subgroups, but we have no *a priori* reason why they should influence proportional risk reductions in events associated with evolocumab treatment.

Although the current analyses have been based on quartiles of age, a subsidiary analysis using specific age breakdowns confirms that with evolocumab there is no diminution in the cardiovascular benefits in the older age groups. The large size of the FOURIER trial population provides a robust way in which to look at the cardiovascular benefits of evolocumab, subdivided by age and sex, and the results are reassuring.

In conclusion, the benefits of evolocumab are similar throughout a broad range of ages and in both men and women. No important safety issues were observed with evolocumab across age groups or in either sex.

## Supplemental material

Supplementary material is available at *European Journal of Preventive Cardiology* online.

## Author contribution

PS, AK, RG, TRP, BK, MSS and MLO'D contributed to the conception or design. PS, IG-B, AK, RG, TRP, KI, HW, BK, MSS and MLO'D contributed to the acquisition, analysis or interpretation. PS drafted the manuscript. PS, IG-B, AK, RG, TRP, KI, HW, BK, MSS and MLO'D critically revised the manuscript. All authors gave final approval and agree to be accountable for all aspects of the work ensuring integrity and accuracy.

## Declaration of conflicting interests

The author(s) declared the following potential conflicts of interest with respect to the research, authorship, and/or publication of this article: PS was a recipient of a National Institute for Health Research (UK) Senior Investigator Award, and receives support from the Biomedical Research Centre Award to Imperial College Healthcare NHS Trust. PS reports grants and personal fees from Amgen, grants and personal fees from Pfizer Inc., during the conduct of the study; grants and personal fees from Amgen, grants and personal fees from Pfizer Inc., outside the submitted work. IGB reports personal fees and non-financial support from Amgen, personal fees and non-financial support from Sanofi, personal fees from Eli Lilly, personal fees from Aegereon, personal fees from Regeneron, personal fees and non-financial support from Akcea, outside the submitted work. AK reports grants and personal fees from Abbott, personal fees from Amgen, personal fees from AstraZeneca, grants and personal fees from Mylan, personal fees from Pfizer, grants from Sanofi, grants from Novartis, personal fees from Bayer, outside the submitted work. RG

reports grants from Amgen, during the conduct of the study; personal fees from Akcea, personal fees from Amarin, personal fees from American College of Cardiology, grants and personal fees from Amgen, personal fees from Angel Med, personal fees from Beckman-Coulter, personal fees from Boeringer-Ingelheim, personal fees from Bristol Myers Squibb, personal fees from CVS Caremark, grants and personal fees from Daiichi Sankyo, personal fees from GlaxoSmithKline, personal fees from Janssen, personal fees from Lexicon, grants and personal fees from Merck, personal fees from Portola, personal fees from Pfizer, personal fees from St Jude, personal fees from Stealth Peptide, outside the submitted work; and institutional research grant to the TIMI Study Group at Brigham and Women's Hospital for research he is not directly involved in from AstraZeneca; Bayer; Eisai; GlaxoSmithKline; Intarcia; Janssen Research and Development; Medicines Company; MedImmune; Novartis; Poxel; Pfizer; Quark Pharmaceuticals; Takeda. TRP reports grants from Amgen during the conduct of the study and speakers bureaus and personal fees from the Amgen Advisory Board, outside the submitted work. KI reports grants from AMGEN, during the conduct of the study, and membership of the TIMI Study Group, which has received institutional research grant support through Brigham and Women's from: Abbott Laboratories, Amgen; AstraZeneca; Critical Diagnostics, Daiichi-Sankyo; Eisai; Genzyme; Gilead; GlaxoSmithKline; Intarcia; Janssen Research and Development; Medicines Company, MedImmune; Merck; Novartis; Pfizer Doxel; Roche Diagnostics; Takeda. HW reports support from AMGEN, Inc., during the conduct of the study. BK reports personal fees from Amgen, during the conduct of the study. MSS reports grants from Amgen, during the conduct of the study; grants and personal fees from Amgen, personal fees from Anthos Therapeutics, grants and personal fees from AstraZeneca, grants from Bayer, personal fees from Bristol-Myers Squibb, personal fees from CVS Caremark, grants from Daiichi-Sankyo, personal fees from DalCor, personal fees from Dynamix, grants from Eisai, personal fees from Esperion, grants from GlaxoSmithKline, personal fees from IFM Therapeutics, grants and personal fees from Intarcia, personal fees from Ionis, grants and personal fees from Janssen Research and Development, grants and personal fees from Medicines Company, grants and personal fees from MedImmune, grants and personal fees from Merck, grants and personal fees from Novartis, grants from Pfizer, grants from Poxel, grants from Quark Pharmaceuticals, grants from Takeda, outside the submitted work. MLO'D reports grants from Amgen, during the con-

duct of the study; grants from Eisai, grants from Medicines Company, grants from AstraZeneca, grants from Merck, grants from GSK, grants from Janssen, personal fees from Novartis, personal fees from Kowa, personal fees from Janssen, outside the submitted work.

## Funding

The author(s) disclosed receipt of the following financial support for the research, authorship, and/or publication of this article: FOURIER was sponsored by AMGEN. All analyses conducted for the purpose of this manuscript were carried out independent of the sponsor.

## References

1. Sabatine MS, Giugliano RP, Keech A, et al. Rationale and design of the Further cardiovascular Outcomes Research with PCSK9 Inhibition in subjects with Elevated Risk trial. *Am Heart J* 2016;**173**:94–101.
2. Sabatine MS, Giugliano RP, Keech AC, et al. FOURIER Steering Committee and Investigators. Evolocumab and clinical outcomes in patients with cardiovascular disease. *N Engl J Med* 2017;**376**:1713–1722.
3. Cholesterol Treatment Trialists' Collaboration. Efficacy and safety of statin therapy in older people: a meta-analysis of individual participant data from 28 randomised controlled trials. *Lancet* 2019;**393**:407–415.
4. Postmus I, Deelen J, Sedaghat S, et al. LDL cholesterol still a problem in old age? A Mendelian randomization study. *Int J Epidemiol* 2015;**2**:606–612.
5. Walsh JM, Pignone M. Drug treatment of hyperlipidemia in women. *JAMA* 2004;**291**:2243–2252.
6. Petretta M, Costanzo P, Perrone-Filardi P, et al. Impact of gender in primary prevention of coronary heart disease with statin therapy: a meta-analysis. *Int J Cardiol* 2010;**138**:25–31.
7. Fulcher J, O'Connell R, Voysey M, et al. Cholesterol Treatment Trialists' (CTT) Collaboration. Efficacy and safety of LDL-lowering therapy among men and women: meta-analysis of individual data from 174,000 participants in 27 randomised trials. *Lancet* 2015;**385**:1397–1405.
8. Gurwitz JH, Go AS, Fortmann SP. Statins for primary prevention in older adults: uncertainty and the need for more evidence. *JAMA* 2016;**316**:1971–1972.
9. Kotseva K, Wood D, De Bacquer D, et al. EUROASPIRE IV: A European Society of Cardiology survey on lifestyle, risk factor and therapeutic management of coronary patients from 24 European countries. *Eur J Prev Cardiol* 2016;**23**:636–648.
10. Khan AU, Talluri S, Riaz H, et al. A Bayesian network meta-analysis of PCSK9 inhibitors, statins and ezetimibe with or without statins for cardiovascular outcomes. *Eur J Prev Cardiol* 2018;**25**:844–853.
11. Kato ET, Cannon CP, Blazing MA, et al. Efficacy and safety of adding ezetimibe to statin therapy among women and men: insight from IMPROVE-IT (Improved Reduction of Outcomes: Vytorin Efficacy International Trial). *JAHA* 2017;**6**: e006901–e006901.
12. Cannon CP, Blazing MA, Giugliano RP, et al. Ezetimibe added to statin therapy after acute coronary syndromes. *N Engl J Med* 2015;**372**:2387–2397.
13. Schwartz GG, Steg PG, Szarek M, et al. ODYSSEY OUTCOMES Committees and Investigators. Alirocumab and cardiovascular outcomes after acute coronary syndrome. *N Engl J Med* 2018;**379**:2097–2107.
